# Supplementary material for: Diagnosis of depression and other patient factors impacts length of stay after total knee arthroplasty
Source: PubMed Central journal article supplement — Arthroplast Today. 2020 Jan 8;6(1):77–80. doi: 10.1016/j.artd.2019.11.010 (PMC7083721; doi:10.1016/j.artd.2019.11.010), 2020-01-08
Supplement: mmc1.pdf [file mmc1.pdf]

# CONFLICT OF INTEREST STATEMENT

## *Arthroplasty Today*

(Adopted from the American Academy of Orthopaedic Surgeons disclosure statement)

The following form **must be filled out completely and submitted by each author (example, 6 authors, 6 forms). If no discloser is required, please write/type "none" at the end of each sentence.**

---

Manuscript Title **Diagnosis of Depression and Other Patient Factors Impact Length of Stay Following Total Knee Arthroplasty**

1. Royalties from a company or supplier (The following conflicts were disclosed)  
**none**
2. Speakers bureau/paid presentations for a company or supplier (The following conflicts were disclosed)  
**none**
- 3A. Paid employee for a company or supplier (The following conflicts were disclosed)  
**none**
- 3B. Paid consultant for a company or supplier (The following conflicts were disclosed)  
**none**
- 3C. Unpaid consultants for a company or supplier (The following conflicts were disclosed)  
**none**
4. Stock or stock options in a company or supplier (The following conflicts were disclosed)  
**none**
5. Research support from a company or supplier as a Principal Investigator (The following conflicts were disclosed)  
**none**
6. Other financial or material support from a company or supplier (The following conflicts were disclosed)  
**none**
7. Royalties, financial or material support from publishers (The following conflicts were disclosed)  
**none**
8. Medical/Orthopaedic publications editorial/governing board (The following conflicts were disclosed)  
**none**
9. Board member/committee appointments for a society (The following conflicts were disclosed)  
**none**

**Each author must sign AND print or type his/her name, date and submit a separate form**

In addition, one BLINDED Conflict of Interest form (no author names used) should be submitted per manuscript with all author disclosures.

Heather T Gold



11.22.19

---

Author Name (Print or Type)

Author Signature

Date
