# Supplementary material for: Diagnosis of depression and other patient factors impacts length of stay after total knee arthroplasty
Source: PubMed Central journal article supplement — Arthroplast Today. 2020 Jan 8;6(1):77–80. doi: 10.1016/j.artd.2019.11.010 (PMC7083721; doi:10.1016/j.artd.2019.11.010), 2020-01-08
Supplement: mmc3.pdf [file mmc3.pdf]

# CONFLICT OF INTEREST STATEMENT

## *Arthroplasty Today*

(Adopted from the American Academy of Orthopaedic Surgeons disclosure statement)

The following form **must be filled out completely and submitted by each author (example, 6 authors, 6 forms). If no discloser is required, please write/type "none" at the end of each sentence.**

---

Manuscript Title **Diagnosis of Depression and Other Patient Factors Impact Length of Stay Following Total Knee Arthroplasty**

1. Royalties from a company or supplier (The following conflicts were disclosed)  
**none**
2. Speakers bureau/paid presentations for a company or supplier (The following conflicts were disclosed)  
**none**
- 3A. Paid employee for a company or supplier (The following conflicts were disclosed)  
**none**
- 3B. Paid consultant for a company or supplier (The following conflicts were disclosed)  
**none**
- 3C. Unpaid consultants for a company or supplier (The following conflicts were disclosed)  
**none**
4. Stock or stock options in a company or supplier (The following conflicts were disclosed)  
**none**
5. Research support from a company or supplier as a Principal Investigator (The following conflicts were disclosed)  
**institutional support Biomet**
6. Other financial or material support from a company or supplier (The following conflicts were disclosed)  
**none**
7. Royalties, financial or material support from publishers (The following conflicts were disclosed)  
**none**
8. Medical/Orthopaedic publications editorial/governing board (The following conflicts were disclosed)  
**none**
9. Board member/committee appointments for a society (The following conflicts were disclosed)  
**Hip evaluation committee AAOS**

**Each author must sign AND print or type his/her name, date and submit a separate form**

In addition, one BLINDED Conflict of Interest form (no author names used) should be submitted per manuscript with all author disclosures.

James Slover

Author Name (Print or Type)

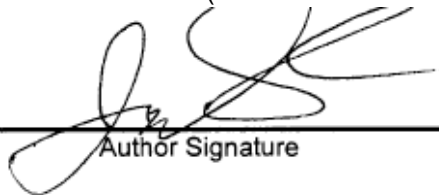

Author Signature

11 .22.19

Date
